# Supplementary material for: Full endoscopic versus open discectomy for sciatica: randomised controlled non-inferiority trial
Source: PubMed Central journal article supplement — BMJ. 2022 Feb 21;376:e065846. doi: 10.1136/bmj-2021-065846 (PMC8859734; doi:10.1136/bmj-2021-065846), 2022-02-21
Supplement: gadp065846.ww1.pdf [file gadp065846.ww1.pdf]

Supplementary table A: All primary and secondary outcomes measured in the PTED-study.

| <b>Outcome</b>                                      | <b>12 month data</b> | <b>24 month data</b> | <b>60 month data</b> | <b>Reporting</b>                                |
|-----------------------------------------------------|----------------------|----------------------|----------------------|-------------------------------------------------|
| <b>Primary outcome</b>                              |                      |                      |                      |                                                 |
| VAS leg pain                                        | X                    | X                    | X                    | Current report on 12 month data                 |
|                                                     |                      |                      |                      |                                                 |
| <b>Secondary outcome</b>                            |                      |                      |                      |                                                 |
| VAS back pain                                       | X                    | X                    | X                    | Current report on 12 month data                 |
| Oswestry disability index                           | X                    | X                    | X                    | Current report on 12 month data                 |
| Quality of life VAS                                 | X                    | X                    | X                    | Current report on 12 month data                 |
| Patient self-perceived recovery and satisfaction    | X                    | X                    | X                    | Current report on 12 month data                 |
| Short Form 36                                       | X                    | X                    | X                    | Current report on 12 month data                 |
| Complications and reoperations                      | X                    | X                    | X                    | Current report on 12 month data                 |
| Physical examination                                | X                    | X                    | X                    | Current report and reported in depth separately |
|                                                     |                      |                      |                      |                                                 |
| Scar size                                           | X                    |                      |                      | Current report and reported in depth separately |
| Body image and cosmesis                             | X                    |                      |                      |                                                 |
|                                                     |                      |                      |                      |                                                 |
| Costs                                               | X                    | X                    |                      | Reported separately in economic evaluation      |
| Utilities (EQ-5D-5L)                                | X                    | X                    |                      |                                                 |
|                                                     |                      |                      |                      |                                                 |
| Learning curve data                                 | X                    |                      |                      | Current report and reported in depth separately |
| Likert-scales on proficiency in PTED of surgeons    | X                    |                      |                      |                                                 |
| Objective structured assessment of technical skills | X                    |                      |                      |                                                 |

Supplementary table B: Characteristics of the patients belonging to the learning curve.

| <b>Characteristic</b>                                 | <b>PTED<br/>(N=125)</b> |
|-------------------------------------------------------|-------------------------|
| Age — yr                                              | 45.8 (11.6)             |
| Male sex—no. (%)                                      | 71 (56.8%)              |
| Current smoker —no. (%)                               | 34 (27.2%)              |
| Body-mass index—kg/m <sup>2</sup>                     | 26.9 (5.0)              |
| Paid employment- no. (%)                              | 102 (81.6%)             |
| Duration of leg pain—months                           | 4.0 (4.0)               |
| Radiating pain in the right leg—no. (%)               | 64 (51.2%)              |
| Sensory disturbances—no. (%)                          | 116 (92.8%)             |
| Muscle weakness —no. (%)                              | 78 (62.4%)              |
| Level of disk herniation causing sciatica —no. (%)    |                         |
| L2-L3                                                 | 0                       |
| L3-L4                                                 | 11 (8.8%)               |
| L4-L5                                                 | 61 (48.8%)              |
| L5-L6                                                 | 1 (0.8%)                |
| L5-S1                                                 | 52 (41.6%)              |
| L6-S1                                                 | 0                       |
| Score on the visual-analogue scale of pain            |                         |
| Leg pain                                              | 76.0 (25.0)             |
| Back pain                                             | 62.0 (38.0)             |
| Oswestry disability index                             | 46.0 (22.0)             |
| Score on the visual-analogue scale of quality of life | 50.6 (23.2)             |
| SF-36 score                                           |                         |
| Physical Component Summary                            | 29.9 (9.7)              |
| Mental Component Summary                              | 48.6 (19.6)             |
| Preference for PTED —no. (%)                          | 85 (68.0%)              |
| Performing surgeon                                    |                         |
| Learning curve surgeon 1 <sup>1</sup>                 | 50 (40.0%)              |
| Learning curve surgeon 2 <sup>2</sup>                 | 43 (34.4%)              |
| Learning curve surgeon 3 <sup>3</sup>                 | 32 (25.6%)              |

1 Learning curve surgeon 1: Thirteen cases were performed under direct supervision, with the remaining 37 cases being performed by the learning curve surgeon alone.

2 Learning curve surgeon 2: Fifteen cases were performed under direct supervision, with the remaining 28 cases being performed by the learning curve surgeon alone.

3 Learning curve surgeon 3: Thirteen cases were performed under direct supervision, with the remaining 19 cases being performed by the learning curve surgeon alone.

Supplementary table C: Primary and secondary outcomes of the patients belonging to the learning curve divided in the early and late learning curve cases. The first 25 patients per surgeon that underwent PTED by the surgeons were categorized as the early cases and the following cases (up to case 50 per surgeon) were categorized as the late cases. Median scores on the VAS, Oswestry disability scale and both Physical and Mental Component Summaries of the SF-36, together with their interquartile range, are shown.

| Variable                           | Outcome                       |                              |                          |                          |
|------------------------------------|-------------------------------|------------------------------|--------------------------|--------------------------|
|                                    | PTED                          |                              |                          | Open microdiscectomy     |
|                                    | <i>Early cases<br/>(N=75)</i> | <i>Late cases<br/>(N=50)</i> | <i>Total<br/>(N=125)</i> | <i>Total<br/>(N=309)</i> |
| VAS leg pain                       |                               |                              |                          |                          |
| 6 weeks                            | 13.0 (27.0)                   | 20.0 (50.0)                  | 16.0 (34.0)              | 21.0 (43.0)              |
| 12 months                          | 7.0 (44.0)                    | 18.0 (47.0)                  | 11.0 (48.0)              | 16.0 (51.0)              |
| Oswestry Disability Index          |                               |                              |                          |                          |
| 6 weeks                            | 15.8 (26.0)                   | 24.0 (22.2)                  | 20.0 (24.0)              | 24.0 (23.7)              |
| 12 months                          | 11.1 (23.5)                   | 14.0 (20.0)                  | 11.1 (22.0)              | 12.7 (24.0)              |
| VAS score for back pain            |                               |                              |                          |                          |
| 6 weeks                            | 16.5 (34.0)                   | 22.0 (38.0)                  | 19.0 (38.0)              | 22.0 (41.0)              |
| 12 months                          | 23.0 (48.0)                   | 17.0 (49.0)                  | 20.0 (46.0)              | 21.0 (51.0)              |
| VAS score for quality of life      |                               |                              |                          |                          |
| 6 weeks                            | 70.5 (34.0)                   | 66.0 (26.0)                  | 67.0 (30.0)              | 64.0 (27.0)              |
| 12 months                          | 78.0 (32.0)                   | 71.0 (30.0)                  | 74.0 (31.0)              | 70.5 (28.0)              |
| SF-36 Physical Component Summary   |                               |                              |                          |                          |
| 6 weeks                            | 41.9 (12.9)                   | 42.3 (14.9)                  | 42.1 (13.8)              | 41.0 (12.9)              |
| 12 months                          | 49.9 (17.0)                   | 47.5 (17.8)                  | 48.4 (16.5)              | 46.4 (15.2)              |
| SF-36 Mental Component Summary     |                               |                              |                          |                          |
| 6 weeks                            | 52.9 (15.6)                   | 51.3 (15.8)                  | 52.5 (15.6)              | 50.1 (16.0)              |
| 12 months                          | 54.1 (9.5)                    | 54.2 (7.4)                   | 54.1 (8.7)               | 53.8 (10.6)              |
| Duration of surgery—minutes        | 58.8 (20.6)                   | 53.9 (16.0)                  | 56.9 (19.1)              |                          |
| Estimated blood loss <10mL         | 62.7%                         | 61.7%                        | 62.3%                    | 68 (27.3%)               |
| Total intraoperative complications |                               |                              |                          |                          |
| Dural tear                         | 0                             | 0                            | 0                        | 8 (3.2%)                 |
| Nerve root injury                  | 0                             | 0                            | 0                        | 1 (0.4%)                 |
| Exploration on wrong level         | 1                             | 0                            | 1 (0.8%)                 | 0                        |
| Other                              | 1                             | 0                            | 1                        | 0                        |
| Underwent open microdiscectomy*    | 2                             | 2                            | 4 (3.3%)                 | -                        |
| Total postoperative complications  |                               |                              |                          |                          |
| Wound hematoma                     | 0                             | 0                            | 0                        | 1 (0.4%)                 |
| Wound infection                    | 0                             | 0                            | 0                        | 3 (1.2%)                 |
| Cerebrospinal fluid leakage        | 0                             | 0                            | 0                        | 2 (0.8%)                 |
| Discharged on day of surgery       | 96%                           | 87.2%                        | 92.6%                    | 5.6%                     |
| Repeated surgery within 1 year     | 9 (12%)                       | 6 (12.8%)                    | 15 (12.3%)               | 14 (5.6%)                |
| Recurrent disk herniation          | 9 (12%)                       | 5 (10.6%)                    | 14 (11.5%)               | 14 (5.6%)                |
| Stenosis                           | 0                             | 1 (2.1%)                     | 1 (0.8%)                 | 0                        |

\*Four cases of conversion.

Supplementary table D: Primary and secondary outcomes on all time points according to the intention-to-treat analysis using mixed model-analysis. Median values with interquartile ranges are shown for the visual analogue scales for leg pain, back pain and quality of life, the Oswestry Disability Index and the Physical and Mental Component Summaries of the SF-36 at the various time points divided per surgical technique. Between-group differences are shown which are adjusted for hospital and baseline scores. Odds ratios of the Likert-scales are also adjusted for hospital.

| Variable                                      | 1 day        |                              |                                                               | 2 weeks      |                              |                                                               | 4 weeks      |                              |                                                               | 6 weeks      |                              |                                                               |
|-----------------------------------------------|--------------|------------------------------|---------------------------------------------------------------|--------------|------------------------------|---------------------------------------------------------------|--------------|------------------------------|---------------------------------------------------------------|--------------|------------------------------|---------------------------------------------------------------|
|                                               | PTED (N=168) | Open microdiscectomy (N=242) | Between-group difference (95%CI); Adjusted and fully adjusted | PTED (N=169) | Open microdiscectomy (N=240) | Between-group difference (95%CI); Adjusted and fully adjusted | PTED (N=169) | Open microdiscectomy (N=241) | Between-group difference (95%CI); Adjusted and fully adjusted | PTED (N=170) | Open microdiscectomy (N=249) | Between-group difference (95%CI); Adjusted and fully adjusted |
| <b>Primary outcome</b>                        |              |                              |                                                               |              |                              |                                                               |              |                              |                                                               |              |                              |                                                               |
| VAS for leg pain                              | 11.0 (36.0)  | 13.0 (32.0)                  | -1.2 (-5.3 to 2.9)<br>-1.9 (-6.1 to 2.5)                      | 24.5 (44.0)  | 25.0 (45.0)                  | -1.2 (-5.8 to 2.9)<br>-1.8 (-6.2 to 2.1)                      | 22.0 (48.0)  | 25.0 (47.0)                  | 1.2 (-2.5 to 5.0)<br>0.8 (-3.2 to 4.6)                        | 18.0 (43.0)  | 21.0 (43.0)                  | 0.2 (-3.1 to 3.6)<br>-0.1 (-3.7 to 3.6)                       |
| <b>Secondary outcome</b>                      |              |                              |                                                               |              |                              |                                                               |              |                              |                                                               |              |                              |                                                               |
| Oswestry Disability Index                     | 48.0 (33.3)  | 60.0 (23.6)                  | 10.6 (7.6 to 13.9)<br>11.1 (8.1 to 14.1)                      | 32.0 (30.0)  | 41.0 (29.2)                  | 6.5 (4.0 to 8.9)<br>6.7 (4.1 to 9.1)                          | 26.0 (24.7)  | 30.0 (26.5)                  | 4.9 (2.9 to 7.1)<br>5.2 (3.2 to 7.2)                          | 20.0 (26.0)  | 24.0 (23.7)                  | 3.4 (1.6 to 5.4)<br>3.8 (1.9 to 5.7)                          |
| VAS for back pain                             | 46.0 (48.0)  | 47.0 (44.0)                  | 4.4 (0 to 8.9)<br>4.7 (0.4 to 9.2)                            | 28.0 (37.0)  | 29.5 (37.0)                  | 1.8 (-1.9 to 5.4)<br>1.7 (-3.0 to 6.4)                        | 23.0 (37.0)  | 24.5 (39.0)                  | 1.4 (-1.7 to 5.0)<br>1.5 (-1.7 to 4.6)                        | 21.0 (36.0)  | 22.0 (41.0)                  | 0.9 (-2.2 to 4.1)<br>0.9 (-2.4 to 4.2)                        |
| VAS for quality of life                       | 61.0 (27.0)  | 51.0 (27.0)                  | -7.5 (-10.9 to -4.0)<br>-7.2 (-10.5 to -3.6)                  | 61 (27.0)    | 56.5 (35.0)                  | -6.8 (-9.8 to -3.9)<br>-6.7 (-9.6 to -3.7)                    | 64.0 (28.0)  | 58.0 (30.0)                  | -8.0 (-10.5 to -5.3)<br>-7.8 (-10.5 to -4.9)                  | 70.0 (24.0)  | 64.0 (27.0)                  | -7.8 (-10.3 to -5.4)<br>-7.6 (-10.2 to -5.2)                  |
| SF-36 Physical Component Summary              | -            | -                            | -<br>-                                                        | 37.8 (11.2)  | 36.9 (9.4)                   | -1.3 (-2.7 to -0.1)<br>-0.8 (-2.0 to 0.3)                     | 40.9 (13.4)  | 37.9 (11.8)                  | -1.6 (-2.9 to -0.3)<br>-1.4 (-2.3 to -0.3)                    | 43.4 (13.2)  | 41.1 (13.0)                  | -1.9 (-3.0 to -0.7)<br>-2.0 (-2.9 to -1.0)                    |
| SF-36 Mental Component Summary                | -            | -                            | -<br>-                                                        | 45.8 (18.4)  | 42.7 (19.7)                  | -1.3 (-3.1 to 0.5)<br>-1.2 (-2.6 to 0.5)                      | 54.7 (15.5)  | 48.3 (16.7)                  | -1.6 (-3.1 to -0.2)<br>-1.0 (-2.2 to 0.3)                     | 53.7 (15.4)  | 50.1 (15.9)                  | -2.3 (-3.5 to -1.0)<br>-1.7 (-2.8 to -0.6)                    |
| Proportion recovered from symptoms            | 81 (48.2%)   | 111 (45.9%)                  | OR 1.2 (0.7 to 2.1)<br>OR 1.2 (0.6 to 2.1)                    | 89 (52.7%)   | 118 (49.2%)                  | OR 1.2 (0.7 to 2.2)<br>OR 1.2 (0.7 to 2.2)                    | 97 (57.4%)   | 135 (56.0%)                  | OR 1.0 (0.6 to 1.8)<br>OR 1.0 (0.6 to 1.9)                    | 113(66.5%)   | 148 (59.4%)                  | OR 1.5 (0.8 to 2.6)<br>OR 1.4 (0.8 to 2.6)                    |
| Proportion recovered from leg pain            | 108 (64.3%)  | 152 (62.8%)                  | OR 1.1 (0.6 to 2.0)<br>OR 1.0 (0.5 to 1.8)                    | 98 (58.0%)   | 144 (60.0%)                  | OR 0.8 (0.5 to 1.5)<br>OR 0.8 (0.4 to 1.4)                    | 103 (60.9%)  | 156 (64.7%)                  | OR 0.7 (0.4 to 1.3)<br>OR 0.7 (0.4 to 1.2)                    | 119(70.0%)   | 168 (67.5%)                  | OR 1.1 (0.6 to 2.0)<br>OR 1.1 (0.6 to 1.9)                    |
| Proportion satisfied with change in symptoms  | -            | -                            | -                                                             | 97 (57.4%)   | 124 (51.7%)                  | OR 1.3 (0.7 to 2.4)<br>OR 1.4 (0.8 to 2.6)                    | 104 (61.5%)  | 139 (57.7%)                  | OR 1.2 (0.7 to 2.1)<br>OR 1.2 (0.7 to 2.2)                    | 112(65.9%)   | 149 (59.8%)                  | OR 1.3 (0.7 to 2.4)<br>OR 1.4 (0.8 to 2.6)                    |
| Proportion satisfied with result of treatment | -            | -                            | -                                                             | 106 (62.7%)  | 140 (58.3%)                  | OR 1.2 (0.7 to 2.2)<br>OR 1.2 (0.7 to 2.3)                    | 112 (66.3%)  | 142 (58.9%)                  | OR 1.4 (0.8 to 2.6)<br>OR 1.5 (0.8 to 2.9)                    | 121(71.2%)   | 155 (62.2%)                  | OR 1.7 (0.9 to 3.1)<br>OR 1.8 (1.0 to 3.4)                    |

|                                               | 3 months     |                              |                                                                | 6 months     |                              |                                                                | 9 months     |                              |                                                                | 12 months    |                              |                                                                |
|-----------------------------------------------|--------------|------------------------------|----------------------------------------------------------------|--------------|------------------------------|----------------------------------------------------------------|--------------|------------------------------|----------------------------------------------------------------|--------------|------------------------------|----------------------------------------------------------------|
|                                               | PTED (N=169) | Open microdiscectomy (N=249) | Between-group difference (95% CI); Adjusted and fully adjusted | PTED (N=163) | Open microdiscectomy (N=235) | Between-group difference (95% CI); Adjusted and fully adjusted | PTED (N=158) | Open microdiscectomy (N=232) | Between-group difference (95% CI); Adjusted and fully adjusted | PTED (N=168) | Open microdiscectomy (N=245) | Between-group difference (95% CI); Adjusted and fully adjusted |
| <b>Primary outcome</b>                        |              |                              |                                                                |              |                              |                                                                |              |                              |                                                                |              |                              |                                                                |
| VAS for leg pain                              | 13.0 (34.0)  | 17.0 (40.0)                  | 1.3 (-2.2 to 5.0)<br>0.6 (-3.2 to 4.2)                         | 11.5 (26.0)  | 14.5 (45.0)                  | 4.9 (1.2 to 8.5)<br>5.0 (1.3 to 8.9)                           | 10.0 (25.0)  | 15.0 (50.0)                  | 6.4 (2.5 to 10.8)<br>6.3 (2.3 to 10.5)                         | 7.0 (31.0)   | 16.0 (51.0)                  | 7.1 (2.8 to 11.3)<br>7.1 (2.3 to 11.3)                         |
| <b>Secondary outcome</b>                      |              |                              |                                                                |              |                              |                                                                |              |                              |                                                                |              |                              |                                                                |
| Oswestry Disability Index                     | 13.3 (22.3)  | 15.6 (21.7)                  | 2.3 (0.2 to 4.3)<br>2.5 (0.4 to 4.5)                           | 11.1 (18.0)  | 14.0 (23.7)                  | 3.1 (0.9 to 5.2)<br>3.4 (1.3 to 5.6)                           | 8.0 (17.8)   | 12.7 (26.0)                  | 5.4 (3.3 to 7.7)<br>5.8 (3.6 to 8.0)                           | 10.0 (16.0)  | 12.7 (24.0)                  | 5.3 (3.0 to 7.7)<br>5.7 (3.3 to 8.0)                           |
| VAS for back pain                             | 17.0 (38.0)  | 23.5 (44.0)                  | 2.7 (-0.4 to 6.4)<br>2.6 (-0.7 to 6.3)                         | 15.5 (37.0)  | 24.5 (47.0)                  | 6.2 (2.8 to 10.0)<br>6.7 (2.6 to 10.7)                         | 15.0 (29.0)  | 26.0 (50.0)                  | 10.3 (7.0 to 14.1)<br>10.7 (6.9 to 14.5)                       | 16.0 (35.0)  | 21.0 (51.0)                  | 6.0 (2.0 to 10.0)<br>6.4 (2.3 to 10.5)                         |
| VAS for quality of life                       | 71.0 (25.0)  | 68.0 (26.0)                  | -5.1 (-7.6 to -2.7)<br>-4.9 (-7.6 to -2.4)                     | 73.0 (23.0)  | 68.0 (26.0)                  | -4.3 (-7.2 to -1.3)<br>-4.5 (-7.5 to -1.6)                     | 74.0 (21.0)  | 70.5 (26.0)                  | -6.0 (-8.7 to -3.4)<br>-6.2 (-8.8 to -3.6)                     | 76.5 (25.0)  | 70.5 (28.0)                  | -6.2 (-9.2 to -3.2)<br>-6.3 (-9.1 to -3.2)                     |
| SF-36 Physical Component Summary              | 46.9 (14.7)  | 45.0 (12.5)                  | -1.5 (-2.6 to -0.4)<br>-1.5 (-2.6 to -0.5)                     | 48.5 (13.0)  | 46.1 (14.7)                  | -1.8 (-3.0 to -0.6)<br>-2.2 (-3.3 to -1.1)                     | 50.5 (14.5)  | 47.3 (14.5)                  | -2.8 (-4.1 to -1.5)<br>-2.2 (-3.4 to -1.1)                     | 50.8 (14.2)  | 46.4 (15.3)                  | -2.8 (-4.1 to -1.6)<br>-2.1 (-3.2 to -0.9)                     |
| SF-36 Mental Component Summary                | 54.3 (10.6)  | 51.4 (14.4)                  | -2.3 (-3.6 to -1.1)<br>-1.9 (-3.0 to -0.7)                     | 54.2 (9.0)   | 53.8 (12.2)                  | -2.1 (-3.4 to -0.7)<br>-1.6 (-2.7 to -0.3)                     | 54.9 (9.1)   | 52.8 (14.2)                  | -3.0 (-4.3 to -1.7)<br>-2.1 (-3.2 to -0.7)                     | 54.6 (7.1)   | 53.8 (10.5)                  | -2.1 (-3.4 to -0.9)<br>-1.5 (-2.6 to -0.3)                     |
| Proportion recovered from symptoms            | 124 (73.4%)  | 164 (65.9%)                  | OR 1.5 (0.8 to 2.8)<br>OR 1.4 (0.8 to 2.6)                     | 120 (73.6%)  | 154 (65.5%)                  | OR 1.6 (0.9 to 3.0)<br>OR 1.5 (0.8 to 2.8)                     | 125 (79.1%)  | 151 (65.1%)                  | OR 2.5 (1.3 to 4.8)<br>OR 2.6 (1.3 to 5.0)                     | 133 (79.2%)  | 157 (64.1%)                  | OR 2.7 (1.4 to 5.2)<br>OR 2.7 (1.4 to 5.3)                     |
| Proportion recovered from leg pain            | 129 (76.3%)  | 172 (69.1%)                  | OR 1.6 (0.9 to 2.9)<br>OR 1.5 (0.8 to 2.7)                     | 125 (76.7%)  | 165 (70.2%)                  | OR 1.5 (0.8 to 2.9)<br>OR 1.6 (0.8 to 3.0)                     | 131 (82.9%)  | 164 (70.7%)                  | OR 2.5 (1.3 to 4.8)<br>OR 2.5 (1.3 to 4.8)                     | 133 (79.2%)  | 169 (69.0%)                  | OR 2.0 (1.0 to 3.7)<br>OR 1.9 (1.0 to 3.6)                     |
| Proportion satisfied with change in symptoms  | 125 (74.0%)  | 156 (62.7%)                  | OR 2.0 (1.1 to 3.6)<br>OR 2.0 (1.1 to 3.8)                     | 119 (73.0%)  | 143 (60.9%)                  | OR 2.1 (1.1 to 4.0)<br>OR 2.3 (1.2 to 4.4)                     | 121 (76.6%)  | 147 (63.4%)                  | OR 2.3 (1.2 to 4.5)<br>OR 2.5 (1.3 to 4.8)                     | 127 (75.6%)  | 150 (61.5%)                  | OR 2.6 (1.4 to 4.8)<br>OR 2.8 (1.4 to 5.2)                     |
| Proportion satisfied with result of treatment | 129 (76.3%)  | 172 (69.1%)                  | OR 1.5 (0.8 to 2.9)<br>OR 1.6 (0.8 to 3.1)                     | 124 (76.1%)  | 155 (66.0%)                  | OR 2.0 (1.0 to 3.8)<br>OR 2.2 (1.1 to 4.2)                     | 124 (78.5%)  | 159 (68.5%)                  | OR 1.9 (1.0 to 3.8)<br>OR 2.1 (1.1 to 4.3)                     | 133 (79.2%)  | 161 (66.0%)                  | OR 2.6 (1.3 to 5.0)<br>OR 2.8 (1.4 to 5.4)                     |

Supplementary table E: Results of the linear and logistic regression analyses of the primary and secondary outcomes at 12 months, according to the intention-to-treat analysis. Median values with interquartile ranges are shown for the visual analogue scales for leg pain, back pain and quality of life, the Oswestry Disability Index and the Physical and Mental Component Summaries of the SF-36 divided per surgical technique. Between-group differences are shown which are adjusted for hospital and baseline scores. Odds ratios of the Likert-scales are also adjusted for hospital.

|                                                  | 12 months       |                                 |                                     |
|--------------------------------------------------|-----------------|---------------------------------|-------------------------------------|
|                                                  | PTED<br>(N=168) | Open microdiscectomy<br>(N=245) | Between-group<br>difference (95%CI) |
| <b>Primary outcome</b>                           |                 |                                 |                                     |
| VAS for leg pain                                 | 8.0 (31.0)      | 16.0 (51.0)                     | 7.9 (1.8 to 13.4)                   |
| <b>Secondary outcome</b>                         |                 |                                 |                                     |
| Oswestry Disability Index                        | 10.0 (16.0)     | 12.7 (24.0)                     | 5.6 (2.6 to 9.0)                    |
| VAS for back pain                                | 16.0 (35.0)     | 21.0 (51.0)                     | 7.0 (1.6 to 12.4)                   |
| VAS for quality of life                          | 75.5 (25.0)     | 70.5 (28.0)                     | -6.3 (-10.4 to -2.0)                |
| SF-36 Physical Component<br>Summary              | 50.8 (14.2)     | 46.4 (15.3)                     | -3.0 (-5.0 to -1.1)                 |
| SF-36 Mental Component<br>Summary                | 54.6 (7.1)      | 53.8 (10.5)                     | -1.8 (-3.6 to -0.2)                 |
| Proportion recovered from<br>symptoms            | 133 (79.2%)     | 157 (64.1%)                     | OR 2.1 (1.3 to 3.4)                 |
| Proportion recovered from<br>leg pain            | 133 (79.2%)     | 169 (69.0%)                     | OR 1.7 (1.0 to 2.7)                 |
| Proportion satisfied with<br>change in symptoms  | 127 (75.6%)     | 150 (61.5%)                     | OR 2.1 (1.3 to 3.3)                 |
| Proportion satisfied with<br>result of treatment | 133 (79.2%)     | 161 (66.0%)                     | OR 2.1 (1.3 to 3.4)                 |

Supplementary table F: Demographics and surgical outcomes according to per protocol analysis

| <b>Characteristic</b>                                 | <b>PTED<br/>(N=168)</b> | <b>Open microdiscectomy<br/>(N=244)</b> |
|-------------------------------------------------------|-------------------------|-----------------------------------------|
| Age — yr                                              | 44.7 (12.5)             | 45.8 (11.1)                             |
| Male sex—no. (%)                                      | 94 (56.0%)              | 139 (57.0%)                             |
| Current smoker —no. (%)                               | 41 (24.4%)              | 79 (32.4%)                              |
| Body-mass index—kg/m <sup>2</sup>                     | 26.6 (4.1)              | 26.7 (4.9)                              |
| Paid employment- no. (%)                              | 143 (85.1%)             | 192 (78.7%)                             |
| Duration of leg pain—months                           | 4.0 (4.0)               | 4.0 (4.0)                               |
| Level of disk herniation causing sciatica —no. (%)    |                         |                                         |
| L2-L3                                                 | 1 (0.6%)                | 6 (2.5%)                                |
| L3-L4                                                 | 14 (8.3%)               | 10 (4.1%)                               |
| L4-L5                                                 | 64 (38.1%)              | 110 (45.1%)                             |
| L5-L6                                                 | 1 (0.6%)                | 1 (0.4%)                                |
| L5-S1                                                 | 88 (52.4%)              | 116 (47.5%)                             |
| L6-S1                                                 | 0                       | 1 (0.4%)                                |
| Score on the visual-analogue scale of pain            |                         |                                         |
| Leg pain                                              | 71.0 (22.0)             | 74.5 (21.0)                             |
| Back pain                                             | 53.0 (45.0)             | 51.0 (51.0)                             |
| Oswestry disability index                             | 46.0 (25.7)             | 44.2 (24.0)                             |
| Score on the visual-analogue scale of quality of life | 48.0 (32.0)             | 51.0 (33.0)                             |
| SF-36 Physical Component Summary                      | 30.4 (11.3)             | 29.3 (11.9)                             |
| SF-36 Mental Component Summary                        | 49.6 (16.8)             | 48.6 (18.9)                             |
| Preference for PTED —no. (%)                          | 144 (85.7%)             | 180 (73.8%)                             |
|                                                       |                         |                                         |
| Duration of surgery—minutes                           | 33.7 (13.9)             | 33.3 (13.5)                             |
| Estimated blood loss <10mL                            | 124 (73.8%)             | 63 (25.8%)                              |
| Dural tear                                            | 0                       | 8 (3.3%)                                |
| Nerve root injury                                     | 0                       | 1 (0.4%)                                |
| Deep venous thrombosis                                | 0                       | 1 (0.4%)                                |
| Exploration on wrong level                            | 1 (0.6%)                | 0                                       |
| Length of stay in hospital                            | 0 (0.2)                 | 1.0 (0.3)                               |
| Discharged on day of surgery                          | 161 (95.8%)             | 11 (4.5%)                               |
| Repeated surgery within 1 year                        | 9 (5.4%)                | 14 (5.7%)                               |

Supplementary table G: Per-protocol analysis of primary and secondary outcomes. Median values with interquartile ranges are shown for the visual analogue scales for leg pain, back pain and quality of life, the Oswestry Disability Index and the Physical and Mental Component Summaries of the SF-36 at the various time points divided per surgical technique. Between-group differences are shown which are adjusted for hospital and baseline scores. Odds ratios of the Likert-scales are also adjusted for hospital.



| Variable                                      | 1 day        |                              |                                   | 2 weeks      |                              |                                   | 4 weeks      |                              |                                   | 6 weeks      |                              |                                   |
|-----------------------------------------------|--------------|------------------------------|-----------------------------------|--------------|------------------------------|-----------------------------------|--------------|------------------------------|-----------------------------------|--------------|------------------------------|-----------------------------------|
|                                               | PTED (N=164) | Open microdiscectomy (N=231) | Between-group difference (95% CI) | PTED (N=165) | Open microdiscectomy (N=231) | Between-group difference (95% CI) | PTED (N=165) | Open microdiscectomy (N=232) | Between-group difference (95% CI) | PTED (N=166) | Open microdiscectomy (N=239) | Between-group difference (95% CI) |
| <b>Primary outcome</b>                        |              |                              |                                   |              |                              |                                   |              |                              |                                   |              |                              |                                   |
| VAS for leg pain                              | 11.0 (36.0)  | 13.0 (33.0)                  | -1.0 (-5.2 to 3.1)                | 24.0 (44.0)  | 26.0 (46.0)                  | -0.3 (-5.0 to 3.8)                | 23.0 (49.0)  | 25.0 (49.0)                  | 2.1 (-1.8 to 6.0)                 | 18.0 (45.0)  | 21.0 (42.0)                  | 1.0 (-2.7 to 4.6)                 |
| <b>Secondary outcome</b>                      |              |                              |                                   |              |                              |                                   |              |                              |                                   |              |                              |                                   |
| Oswestry Disability Index                     | 48.0 (33.2)  | 60.0 (22.9)                  | 11.8 (8.5 to 14.8)                | 32.0 (29.0)  | 42.0 (28.9)                  | 7.0 (4.7 to 9.8)                  | 26.0 (24.3)  | 30.0 (26.7)                  | 5.4 (3.4 to 7.5)                  | 20.0 (26.8)  | 24.4 (24.4)                  | 4.0 (1.9 to 6.0)                  |
| VAS for back pain                             | 46.0 (47.0)  | 47.0 (43.0)                  | 5.7 (1.4 to 10.5)                 | 28.0 (36.0)  | 30.0 (38.0)                  | 2.2 (-1.5 to 5.6)                 | 25.0 (39.0)  | 25.0 (39.0)                  | 2.0 (-1.2 to 5.5)                 | 22.0 (40.0)  | 22.0 (41.0)                  | 1.4 (-2.1 to 4.8)                 |
| VAS for quality of life                       | 61.0 (27.0)  | 52.0 (27.0)                  | -8.0 (-11.5 to -4.5)              | 63.0 (29.0)  | 55.0 (34.0)                  | -7.3 (-10.3 to -4.4)              | 64.0 (28.0)  | 57.0 (30.0)                  | -8.4 (-11.1 to -5.6)              | 70.0 (25.0)  | 64.0 (27.0)                  | -8.3 (-10.9 to -5.7)              |
| SF-36 Physical Component Summary              | -            | -                            | -                                 | 38.0 (11.2)  | 36.9 (9.4)                   | -1.5 (-2.7 to -0.3)               | 40.9 (13.3)  | 37.8 (11.6)                  | -1.7 (-2.9 to -0.5)               | 43.0 (13.3)  | 40.5 (12.9)                  | -2.1 (-3.3 to -0.9)               |
| SF-36 Mental Component Summary                | -            | -                            | -                                 | 44.9 (18.7)  | 42.9 (20.1)                  | -1.2 (-3.0 to 0.6)                | 51.2 (15.7)  | 48.4 (16.5)                  | -1.5 (-2.9 to -0.1)               | 53.7 (14.7)  | 50.1 (15.7)                  | -2.1 (-3.4 to -0.1)               |
| Proportion recovered from symptoms            | 78 (47.6%)   | 104 (45.0%)                  | OR 1.2 (0.7 to 2.2)               | 87 (52.7%)   | 111 (48.1%)                  | OR 1.4 (0.8 to 2.5)               | 94 (57.0%)   | 127 (54.7%)                  | OR 1.1 (0.6 to 2.0)               | 110 (66.3%)  | 140 (58.6%)                  | OR 1.6 (0.9 to 2.9)               |
| Proportion recovered from leg pain            | 105 (64.0%)  | 145 (62.8%)                  | OR 1.1 (0.6 to 2.0)               | 96 (58.2%)   | 138 (59.7%)                  | OR 0.9 (0.5 to 1.6)               | 100 (60.6%)  | 148 (63.8%)                  | OR 0.8 (0.4 to 1.4)               | 116 (69.9%)  | 159 (66.5%)                  | OR 1.2 (0.7 to 2.2)               |
| Proportion satisfied with change in symptoms  | -            | -                            | -                                 | 96 (58.2%)   | 117 (50.6%)                  |                                   | 101 (61.2%)  | 131 (56.5%)                  | OR 1.3 (0.7 to 2.3)               | 109 (65.7%)  | 140 (58.6%)                  | OR 1.5 (0.8 to 2.7)               |
| Proportion satisfied with result of treatment | -            | -                            | -                                 | 104 (63.0%)  | 136 (58.9%)                  |                                   | 110 (66.7%)  | 136 (58.6%)                  | OR 1.6 (0.9 to 2.9)               | 118 (71.1%)  | 147 (61.5%)                  | OR 1.8 (1.0 to 3.4)               |

|                                                  | 3 months        |                                    |                                     | 6 months        |                                    |                                     | 9 months        |                                    |                                     | 12 months       |                                    |                                     |
|--------------------------------------------------|-----------------|------------------------------------|-------------------------------------|-----------------|------------------------------------|-------------------------------------|-----------------|------------------------------------|-------------------------------------|-----------------|------------------------------------|-------------------------------------|
|                                                  | PTED<br>(N=165) | Open<br>microdiscectomy<br>(N=236) | Between-group<br>difference (95%CI) | PTED<br>(N=159) | Open<br>microdiscectomy<br>(N=221) | Between-group<br>difference (95%CI) | PTED<br>(N=153) | Open<br>microdiscectomy<br>(N=217) | Between-group<br>difference (95%CI) | PTED<br>(N=164) | Open<br>microdiscectomy<br>(N=227) | Between-group<br>difference (95%CI) |
| <b>Primary outcome</b>                           |                 |                                    |                                     |                 |                                    |                                     |                 |                                    |                                     |                 |                                    |                                     |
| VAS for leg pain                                 | 13.0 (34.0)     | 17.0 (40.0)                        | 1.6 (-2.1 to 5.2)                   | 11.0 (24.0)     | 15.0 (44.0)                        | 6.2 (2.4 to 9.9)                    | 10.0 (24.0)     | 15.0 (52.0)                        | 7.7 (3.3 to 11.8)                   | 7.0 (29.0)      | 18.0 (53.0)                        | 8.3 (4.1 to 12.8)                   |
| <b>Secondary outcome</b>                         |                 |                                    |                                     |                 |                                    |                                     |                 |                                    |                                     |                 |                                    |                                     |
| Oswestry Disability Index                        | 14.0 (22.7)     | 15.6 (22.0)                        | 2.7 (0.5 to 4.8)                    | 11.1 (16.0)     | 14.0 (24.0)                        | 3.7 (1.6 to 6.0)                    | 8.0 (17.8)      | 12.0 (26.0)                        | 6.2 (4.0 to 8.4)                    | 10.0 (17.0)     | 12.0 (24.9)                        | 5.8 (3.4 to 8.3)                    |
| VAS for back pain                                | 19.0 (42.0)     | 23.0 (45.0)                        | 3.0 (-0.9 to 6.7)                   | 15.0 (37.0)     | 25.0 (47.0)                        | 7.3 (3.5 to 11.1)                   | 15.0 (28.0)     | 26.0 (50.0)                        | 11.3 (7.6 to 15.0)                  | 16.0 (35.0)     | 22.0 (52.0)                        | 6.9 (2.8 to 10.9)                   |
| VAS for quality of life                          | 70.0 (25.0)     | 68.0 (26.0)                        | -5.4 (-8.0 to -2.6)                 | 74.0 (22.0)     | 68.0 (27.0)                        | -5.3 (-8.4 to -2.1)                 | 74.0 (21.0)     | 70.0 (27.0)                        | -6.9 (-9.6 to -4.1)                 | 75.0 (26.0)     | 69.0 (28.0)                        | -7.0 (-10.0 to -4.0)                |
| SF-36 Physical Component<br>Summary              | 46.9 (14.3)     | 44.9 (12.6)                        | -1.6 (-2.7 to -0.3)                 | 48.4 (13.2)     | 45.8 (14.1)                        | -2.1 (-3.4 to -0.9)                 | 50.5 (14.6)     | 47.6 (14.6)                        | -3.0 (-4.4 to -1.7)                 | 50.9 (14.5)     | 46.3 (15.3)                        | -3.0 (-4.3 to -1.7)                 |
| SF-36 Mental Component<br>Summary                | 54.3 (11.0)     | 51.5 (14.2)                        | -2.4 (-3.7 to -1.2)                 | 54.2 (9.2)      | 54.2 (12.0)                        | -2.0 (-3.4 to -0.7)                 | 55.0 (9.2)      | 52.9 (14.2)                        | -3.2 (-4.5 to -1.8)                 | 54.6 (7.2)      | 53.9 (10.7)                        | -2.4 (-3.6 to -1.1)                 |
| Proportion recovered from<br>symptoms            | 120 (72.7%)     | 155 (65.7%)                        | OR 1.4 (0.8 to 2.8)                 | 117 (73.6%)     | 142 (64.3%)                        | OR 1.8 (0.9 to 3.4)                 | 123 (80.4%)     | 139 (64.1%)                        | OR 3.0 (1.5 to 5.9)                 | 129 (78.7%)     | 143 (63.0%)                        | OR 2.8 (1.4 to 5.5)                 |
| Proportion recovered from<br>leg pain            | 125 (75.8%)     | 163 (69.1%)                        | OR 1.5 (0.8 to 2.9)                 | 122 (76.7%)     | 152 (68.8%)                        | OR 1.7 (0.9 to 3.3)                 | 129 (84.3%)     | 151 (69.6%)                        | OR 3.1 (1.5 to 6.2)                 | 130 (79.3%)     | 154 (67.8%)                        | OR 2.2 (1.1 to 4.2)                 |
| Proportion satisfied with<br>change in symptoms  | 121 (73.3%)     | 146 (61.9%)                        | OR 2.0 (1.1 to 3.8)                 | 116 (73.0%)     | 131 (59.3%)                        | OR 2.4 (1.3 to 4.5)                 | 119<br>(77.8%)  | 136 (62.7%)                        | OR 2.7 (1.4 to 5.3)                 | 125 (76.2%)     | 136 (59.9%)                        | OR 3.0 (1.6 to 5.7)                 |
| Proportion satisfied with<br>result of treatment | 125 (75.8%)     | 161 (68.2%)                        | OR 1.6 (0.8 to 3.0)                 | 121 (76.1%)     | 143 (64.7%)                        | OR 2.2 (1.1 to 4.2)                 | 122 (79.7%)     | 146 (67.3%)                        | OR 2.3 (1.2 to 4.7)                 | 130 (79.3%)     | 147 (64.8%)                        | OR 2.8 (1.5 to 5.6)                 |

Supplementary table H: Analysis of primary and secondary outcomes of all patients including learning curve cases according to the intention-to-treat analysis. Median values with interquartile ranges are shown for the visual analogue scales for leg pain, back pain and quality of life, the Oswestry Disability Index and the Physical and Mental Component Summaries of the SF-36 at the various time points divided per surgical technique. Between-group differences are shown which are adjusted for hospital and baseline scores. Odds ratios of the Likert-scales are also adjusted for hospital.

| Variable                                      | 1 day        |                              |                                   | 2 weeks      |                              |                                   | 4 weeks      |                              |                                   | 6 weeks      |                              |                                   |
|-----------------------------------------------|--------------|------------------------------|-----------------------------------|--------------|------------------------------|-----------------------------------|--------------|------------------------------|-----------------------------------|--------------|------------------------------|-----------------------------------|
|                                               | PTED (N=288) | Open microdiscectomy (N=242) | Between-group difference (95% CI) | PTED (N=289) | Open microdiscectomy (N=240) | Between-group difference (95% CI) | PTED (N=290) | Open microdiscectomy (N=241) | Between-group difference (95% CI) | PTED (N=292) | Open microdiscectomy (N=249) | Between-group difference (95% CI) |
| <b>Primary outcome</b>                        |              |                              |                                   |              |                              |                                   |              |                              |                                   |              |                              |                                   |
| VAS for leg pain                              | 11.0 (30.0)  | 13.0 (32.0)                  | -0.6 (-4.3 to 3.2)                | 24.0 (47.0)  | 25.0 (45.0)                  | -1.7 (-5.2 to 1.5)                | 22.0 (45.0)  | 25.0 (47.0)                  | 1.7 (-1.7 to 4.9)                 | 17.0 (40.0)  | 21.0 (42.0)                  | 0.8 (-2.4 to 4.1)                 |
| <b>Secondary outcome</b>                      |              |                              |                                   |              |                              |                                   |              |                              |                                   |              |                              |                                   |
| Oswestry Disability Index                     | 48.9 (30.7)  | 60.0 (23.6)                  | 9.0 (6.2 to 11.8)                 | 33.3 (30.0)  | 42.0 (29.2)                  | 4.3 (2.1 to 6.7)                  | 26.0 (22.0)  | 30.0 (26.5)                  | 3.9 (2.2 to 5.6)                  | 20.0 (25.7)  | 24.0 (24.4)                  | 3.2 (1.6 to 4.9)                  |
| VAS for back pain                             | 40.0 (43.0)  | 47.0 (44.0)                  | 6.5 (2.6 to 10.3)                 | 28.0 (37.0)  | 30.0 (37.0)                  | 1.9 (-1.2 to 5.1)                 | 23.0 (39.0)  | 24.5 (39.0)                  | 1.1 (-1.6 to 4.0)                 | 21.0 (38.0)  | 22.0 (41.0)                  | 2.2 (-0.5 to 5.0)                 |
| VAS for quality of life                       | 58.0 (26.0)  | 51.0 (27.0)                  | -5 (-8.0 to -2.4)                 | 61.0 (28.0)  | 56.0 (35.0)                  | -4.8 (-7.5 to -2.1)               | 64.0 (28.0)  | 58.0 (30.0)                  | -6.1 (-8.8 to -3.9)               | 70.0 (27.0)  | 64.0 (27.0)                  | -8.4 (-10.8 to -3.3)              |
| SF-36 Physical Component Summary              | -            | -                            | -                                 | 37.2 (10.1)  | 36.9 (9.4)                   | -0.6 (-1.7 to 0.4)                | 40.1 (13.0)  | 37.9 (11.8)                  | -1.2 (-2.2 to -0.1)               | 42.7 (13.4)  | 41.1 (13.0)                  | -1.7 (-2.6 to -0.7)               |
| SF-36 Mental Component Summary                | -            | -                            | -                                 | 45.9 (19.6)  | 42.7 (19.7)                  | -1.0 (-2.7 to 0.5)                | 50.6 (16.6)  | 48.3 (16.7)                  | -0.9 (-2.2 to 0.4)                | 53.0 (15.4)  | 50.1 (15.9)                  | -1.7 (-2.8 to -0.6)               |
| Proportion recovered from symptoms            | 139 (48.3 %) | 111 (45.9 %)                 | OR 1.2 (0.7 to 2.1)               | 145 (50.2 %) | 118 (49.2 %)                 | OR 1.1 (0.7 to 1.9)               | 164 (56.6 %) | 135 (56.0 %)                 | OR 1.0 (0.6 to 1.7)               | 183 (62.7 %) | 148 (59.4 %)                 | OR 1.2 (0.7 to 2.0)               |
| Proportion recovered from leg pain            | 184 (63.9 %) | 152 (62.8 %)                 | OR 1.0 (0.6 to 1.8)               | 167 (57.8 %) | 144 (60.0 %)                 | OR 0.8 (0.5 to 1.4)               | 180 (62.1 %) | 156 (64.7 %)                 | OR 0.8 (0.5 to 1.4)               | 198 (67.8 %) | 168 (67.5 %)                 | OR 1.0 (0.6 to 1.7)               |
| Proportion satisfied with change in symptoms  | -            | -                            | -                                 | 166 (57.4 %) | 124 (51.7 %)                 | OR 1.5 (0.9 to 2.5)               | 174 (60.0 %) | 139 (57.7 %)                 | OR 1.2 (0.7 to 2.0)               | 186 (63.7 %) | 149 (59.8 %)                 | OR 1.3 (0.8 to 2.2)               |
| Proportion satisfied with result of treatment | -            | -                            | -                                 | 179 (61.9 %) | 140 (58.3 %)                 | OR 1.2 (0.7 to 2.1)               | 191 (65.9 %) | 142 (58.9 %)                 | OR 1.6 (0.9 to 2.8)               | 201 (68.8 %) | 155 (62.2 %)                 | OR 1.7 (1.0 to 2.8)               |

| Variable                                      | 3 months     |                              |                                   | 6 months     |                              |                                   | 9 months     |                              |                                   | 12 months    |                              |                                   |
|-----------------------------------------------|--------------|------------------------------|-----------------------------------|--------------|------------------------------|-----------------------------------|--------------|------------------------------|-----------------------------------|--------------|------------------------------|-----------------------------------|
|                                               | PTED (N=289) | Open microdiscectomy (N=249) | Between-group difference (95% CI) | PTED (N=285) | Open microdiscectomy (N=235) | Between-group difference (95% CI) | PTED (N=278) | Open microdiscectomy (N=232) | Between-group difference (95% CI) | PTED (N=287) | Open microdiscectomy (N=245) | Between-group difference (95% CI) |
| <b>Primary outcome</b>                        |              |                              |                                   |              |                              |                                   |              |                              |                                   |              |                              |                                   |
| VAS for leg pain                              | 11.0 (37.0)  | 17.0 (40.0)                  | 0.8 (-2.3 to 4.1)                 | 12.0 (28.0)  | 15.0 (44.0)                  | 3.8 (0.8 to 7.2)                  | 10.0 (33.0)  | 15.0 (50.0)                  | 4.4 (0.8 to 8.1)                  | 8.0 (33.0)   | 17.5 (51.0)                  | 4.5 (0.6 to 8.4)                  |
| <b>Secondary outcome</b>                      |              |                              |                                   |              |                              |                                   |              |                              |                                   |              |                              |                                   |
| Oswestry Disability Index                     | 13.3 (20.4)  | 15.6 (21.7)                  | 2.0 (0.3 to 3.9)                  | 10.0 (17.8)  | 14.0 (22.7)                  | 2.7 (0.8 to 4.6)                  | 8.0 (20.0)   | 12.7 (26.0)                  | 3.8 (1.8 to 5.7)                  | 11.1 (18.0)  | 13.3 (25.4)                  | 3.7 (1.5 to 5.8)                  |
| VAS for back pain                             | 17.0 (42.0)  | 23.5 (44.0)                  | 2.8 (-0.1 to 5.7)                 | 16.0 (41.0)  | 24.5 (47.0)                  | 6.1 (3.0 to 9.3)                  | 15.0 (35.0)  | 26.0 (50.0)                  | 8.8 (5.5 to 12.3)                 | 17.0 (40.0)  | 22.0 (51.0)                  | 4.0 (0.8 to 7.3)                  |
| VAS for quality of life                       | 72.0 (25.0)  | 68.0 (26.0)                  | -4.1 (-6.4 to -1.9)               | 74.0 (24.0)  | 68.0 (27.0)                  | -4.0 (-6.8 to -1.5)               | 74.0 (25.0)  | 70.5 (26.0)                  | -3.3 (-5.9 to -1.0)               | 75.0 (27.0)  | 69.5 (28.0)                  | -4.8 (-7.2 to -2.5)               |
| SF-36 Physical Component Summary              | 47.0 (15.9)  | 45.0 (12.5)                  | -1.4 (-2.4 to -0.4)               | 48.9 (12.9)  | 46.1 (14.7)                  | -1.9 (-2.9 to -0.9)               | 49.3 (15.2)  | 47.3 (14.5)                  | -1.9 (-3.1 to -0.8)               | 50.2 (15.0)  | 46.4 (15.3)                  | -1.8 (-2.9 to -0.8)               |
| SF-36 Mental Component Summary                | 54.3(11.2)   | 51.4 (14.4)                  | -1.7 (-2.8 to -0.5)               | 53.8 (9.0)   | 53.8 (12.2)                  | -1.4 (-2.5 to -0.2)               | 54.6 (9.2)   | 52.8 (14.2)                  | -1.8 (-3.0 to -0.6)               | 54.5 (7.7)   | 53.8 (10.5)                  | -1.1 (-2.3 to 0)                  |
| Proportion recovered from symptoms            | 206 (71.3 %) | 164 (65.9 %)                 | OR 1.3 (0.8 to 2.2)               | 202 (70.9 %) | 154 (65.5%)                  | OR 1.4 (0.8 to 2.4)               | 199 (71.6 %) | 151 (65.1 %)                 | OR 1.6 (0.9 to 2.7)               | 211 (73.5 %) | 157 (64.1 %)                 | OR 1.8 (1.1 to 3.2)               |
| Proportion recovered from leg pain            | 216 (74.7 %) | 172 (69.1 %)                 | OR 1.4 (0.8 to 2.3)               | 214 (75.1 %) | 165 (70.2 %)                 | OR 1.5 (0.9 to 2.5)               | 210 (75.5 %) | 164 (70.7 %)                 | OR 1.5 (0.9 to 2.5)               | 216 (75.3 %) | 169 (69.0 %)                 | OR 1.5 (0.9 to 2.6)               |
| Proportion satisfied with change in symptoms  | 206 (71.3 %) | 156 (62.7 %)                 | OR 1.8 (1.1 to 3.0)               | 200 (70.2 %) | 143 (60.9 %)                 | OR 2.0 (1.2 to 3.4)               | 201 (72.3%)  | 147 (63.4 %)                 | OR 1.9 (1.1 to 3.3)               | 199 (69.3%)  | 150 (61.5 %)                 | OR 1.8 (1.1 to 3.0)               |
| Proportion satisfied with result of treatment | 213 (71.6 %) | 172 (69.1 %)                 | OR 1.4 (0.8 to 2.4)               | 207 (72.6 %) | 155 (66.0 %)                 | OR 1.8 (1.0 to 3.1)               | 207 (74.5%)  | 159 (68.5 %)                 | OR 1.7 (1.0 to 3.0)               | 209 (72.8 %) | 161 (66.0 %)                 | OR 1.7 (1.0 to 3.0)               |

Supplementary table I: Analyses using the numeric rating scale instead of the visual-analogue scale according to the intention-to-treat and per protocol analysis. Median numeric rating scale scores with interquartile ranges for leg pain, back pain and quality of life are shown at the various time points divided per surgical technique. Between-group differences are shown which are adjusted for hospital and baseline scores.

| Variable                  | 1 day        |                      |                                   | 2 weeks      |                      |                                   | 4 weeks      |                      |                                   | 6 weeks      |                      |                                   |
|---------------------------|--------------|----------------------|-----------------------------------|--------------|----------------------|-----------------------------------|--------------|----------------------|-----------------------------------|--------------|----------------------|-----------------------------------|
|                           | PTED         | Open microdiscectomy | Between-group difference (95% CI) | PTED         | Open microdiscectomy | Between-group difference (95% CI) | PTED         | Open microdiscectomy | Between-group difference (95% CI) | PTED         | Open microdiscectomy | Between-group difference (95% CI) |
| <b>Intention-to-treat</b> | <b>N=137</b> | <b>N=180</b>         |                                   | <b>N=142</b> | <b>N=182</b>         |                                   | <b>N=145</b> | <b>N=188</b>         |                                   | <b>N=149</b> | <b>N=201</b>         |                                   |
| NRS for leg pain          | 2 (4)        | 2 (4)                | -0.1 (-0.6 to 0.4)                | 3 (4)        | 3.0 (4.0)            | 0.1 (-0.4 to 0.6)                 | 3 (4)        | 3 (4)                | 0.2 (-0.2 to 0.5)                 | 2 (4)        | 3 (4)                | 0.2 (-0.2 to 0.6)                 |
| NRS for back pain         | 5 (4)        | 5 (4)                | 0.5 (0.1 to 1.0)                  | 3 (3)        | 4.0 (3.0)            | 0.3 (-0.1 to 0.6)                 | 3 (4)        | 3 (3)                | 0.2 (-0.1 to 0.6)                 | 3 (4)        | 3 (3)                | 0.2 (-0.1 to 0.6)                 |
| NRS for quality of life   | 6 (2)        | 6 (2)                | -0.3 (-0.6 to -0.1)               | 6 (3)        | 6.0 (2.0)            | -0.4 (-0.6 to -0.1)               | 7 (2)        | 6 (2)                | -0.5 (-0.7 to -0.2)               | 7 (2)        | 7 (3)                | -0.6 (-0.8 to -0.4)               |
| <b>Per-protocol</b>       | <b>N=133</b> | <b>N=169</b>         |                                   | <b>N=138</b> | <b>N=173</b>         |                                   | <b>N=141</b> | <b>N=179</b>         |                                   | <b>N=145</b> | <b>N=191</b>         |                                   |
| NRS for leg pain          | 2 (4)        | 2 (4)                | -0.1 (-0.7 to 0.4)                | 3 (4)        | 3.0 (4.0)            | 0.1 (-0.4 to 0.6)                 | 3 (4)        | 3 (4)                | 0.2 (-0.2 to 0.6)                 | 2 (5)        | 3 (4)                | 0.3 (-0.1 to 0.6)                 |
| NRS for back pain         | 5 (4)        | 5 (4)                | 0.7 (0.2 to 1.1)                  | 3 (3)        | 4.0 (4.0)            | 0.3 (-0.1 to 0.7)                 | 3 (4)        | 3 (3)                | 0.3 (-0.1 to 0.7)                 | 3 (3)        | 3 (3)                | 0.3 (-0.1 to 0.7)                 |
| NRS for quality of life   | 6 (2)        | 6 (2)                | -0.3 (-0.6 to 0)                  | 7 (3)        | 6.0 (2.0)            | -0.4 (-0.6 to -0.1)               | 7 (2)        | 7 (2)                | -0.5 (-0.7 to -0.2)               | 7 (2)        | 7 (3)                | -0.6 (-0.8 to -0.4)               |

| Variable                  | 3 months     |                      |                                   | 6 months     |                      |                                   | 9 months     |                      |                                   | 12 months    |                      |                                   |
|---------------------------|--------------|----------------------|-----------------------------------|--------------|----------------------|-----------------------------------|--------------|----------------------|-----------------------------------|--------------|----------------------|-----------------------------------|
|                           | PTED         | Open microdiscectomy | Between-group difference (95% CI) | PTED         | Open microdiscectomy | Between-group difference (95% CI) | PTED         | Open microdiscectomy | Between-group difference (95% CI) | PTED         | Open microdiscectomy | Between-group difference (95% CI) |
| <b>Intention-to-treat</b> | <b>N=152</b> | <b>N=209</b>         |                                   | <b>N=155</b> | <b>N=210</b>         |                                   | <b>N=150</b> | <b>N=224</b>         |                                   | <b>N=168</b> | <b>N=245</b>         |                                   |
| NRS for leg pain          | 2 (4)        | 3 (4)                | 0.3 (-0.1 to 0.7)                 | 2 (3)        | 2 (4)                | 0.4 (0 to 0.8)                    | 2 (4)        | 3 (5)                | 0.6 (0.2 to 1.1)                  | 1 (4)        | 2 (6)                | 0.6 (0.2 to 1.1)                  |
| NRS for back pain         | 3 (4)        | 3 (4)                | 0.3 (0 to 0.7)                    | 2 (4)        | 3 (4)                | 0.5 (0.1 to 1.0)                  | 2 (3)        | 3 (4)                | 1.0 (0.6 to 1.4)                  | 2 (3)        | 3 (5)                | 0.6 (0.1 to 1.1)                  |
| NRS for quality of life   | 7 (2)        | 7 (2)                | -0.2 (-0.5 to 0)                  | 7 (2)        | 7 (2)                | -0.3 (-0.5 to 0)                  | 7 (1)        | 7 (2)                | -0.4 (-0.7 to -0.2)               | 8 (1)        | 7 (2)                | -0.5 (-0.8 to -0.2)               |
| <b>Per-protocol</b>       | <b>N=148</b> | <b>N=196</b>         |                                   | <b>N=151</b> | <b>N=196</b>         |                                   | <b>N=145</b> | <b>N=209</b>         |                                   | <b>N=164</b> | <b>N=227</b>         |                                   |
| NRS for leg pain          | 3 (4)        | 2 (4)                | 0.3 (-0.1 to 0.8)                 | 2 (3)        | 2 (4)                | 0.5 (0 to 0.9)                    | 2 (4)        | 3 (5)                | 0.7 (0.2 to 1.1)                  | 1 (4)        | 2 (6)                | 0.7 (0.2 to 1.2)                  |
| NRS for back pain         | 3 (4)        | 3 (4)                | 0.3 (0 to 0.7)                    | 2 (4)        | 3 (4)                | 0.7 (0.2 to 1.1)                  | 2 (3)        | 3 (5)                | 1.0 (0.6 to 1.5)                  | 2 (3)        | 3 (5)                | 0.7 (0.3 to 1.1)                  |
| NRS for quality of life   | 7 (2)        | 7 (2)                | -0.2 (-0.4 to 0)                  | 7 (1)        | 7 (2)                | -0.3 (-0.6 to -0.1)               | 7 (1)        | 7 (2)                | -0.4 (-0.7 to -0.2)               | 8 (2)        | 7 (2)                | -0.5 (-0.8 to -0.3)               |
